# Supplementary material for: Mechanical strain, thermal and pressure effects on the absorption edge of an organic charge-transfer polymer for flexible photovoltaics and sensors
Source: Royal Society of Chemistry journal article supplement (doi:10.1039/d1ma01066b), 2022-01-01
Supplement: d1ma01066b1.pdf [file d1ma01066b1.pdf]

## Supporting Information:

### Mechanical strain, thermal and pressure effects on the absorption edge of an organic charge-transfer polymer for flexible photovoltaics and sensors

Paulina Ratajczyk,<sup>a</sup> Andrzej Katrusiak,<sup>\*a</sup> Krzysztof A. Bogdanowicz,<sup>b</sup> Wojciech Przybył,<sup>b</sup> Piotr Krysiak,<sup>b</sup> Anna Kwak<sup>b</sup> and Agnieszka Iwan<sup>\*b</sup>

<sup>a</sup> Faculty of Chemistry, Adam Mickiewicz University, Uniwersytetu Poznańskiego 8, 61-614 Poznań, Poland, \*e-mail: katran@amu.edu.pl katran@amu.edu.pl

<sup>b</sup> Military Institute of Engineer Technology, Obornicka 136, 50-961 Wrocław, Poland, \*e-mail: iwan@witi.wroc.pl

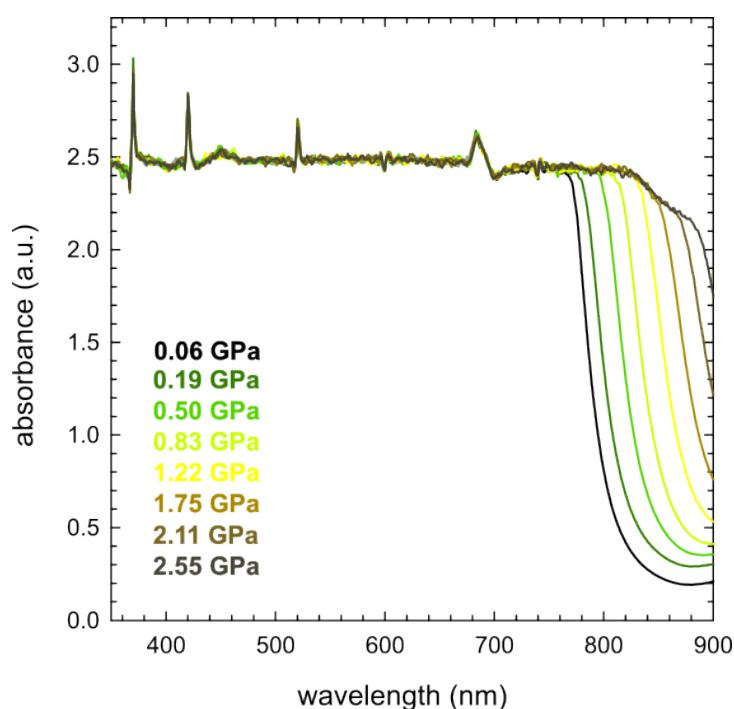

**Figure S1.** High-pressure absorbance spectra for a thin layer prepared by pressing PTB7 into a diamond culet.

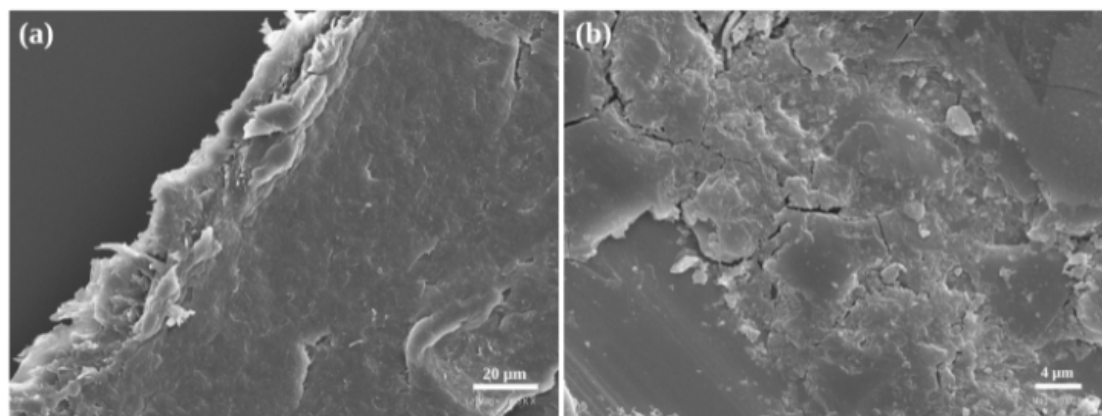

**Figure S2.** Scanning electron microscopy (SEM) photos of a (a) thin layer formed after pressing PTB7 into a diamond culet and (b) after evaporation of the dichloromethane.

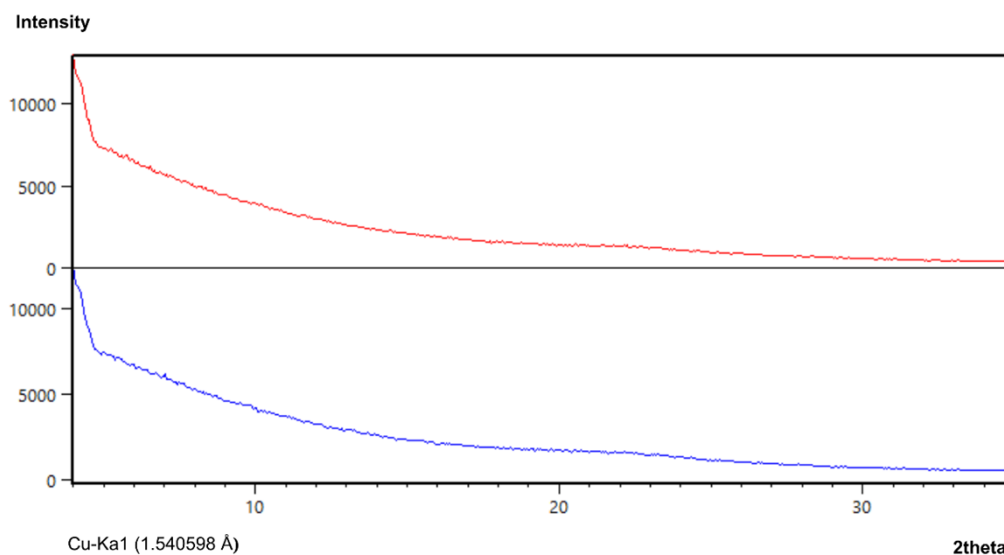

**Figure S3.** XRD collected for the sample of PTB7 (as delivered, top) and for the film of PTB7 obtained by evaporating the 1,2-dichlorobenzene solution (bottom). The measurements were performed with CuK $\alpha$ 1 line of 1.540598 Å.

**Table S1.** Tensile test performance for PTB7 single and double layer (thickness 0.17mm) over PET/ITO.

| Sample                             | Sample No. | Cross-section area [mm <sup>2</sup> ] | Stress at break [MPa] | Elongation at break [%] |
|------------------------------------|------------|---------------------------------------|-----------------------|-------------------------|
| <b>PET/ITO/PTB7 (single layer)</b> | 1          | 1.58                                  | 85.6                  | 73                      |
|                                    | 2          | 1.75                                  | 97.6                  | 131                     |
|                                    | 3          | 1.76                                  | 87.2                  | 92                      |
|                                    | 4          | 1.61                                  | 101.8                 | 158                     |
| <b>PET/ITO/PTB7 (double layer)</b> | 5          | 1.67                                  | 143.4                 | 127                     |
|                                    | 6          | 1.62                                  | 162.1                 | 123                     |
|                                    | 7          | 1.83                                  | 162.4                 | 108                     |
|                                    | 8          | 1.72                                  | 152.0                 | 92                      |
|                                    | 9          | 1.69                                  | 157.0                 | 104                     |
